# Supplementary material for: What is rural? Examining the relationship between human populations and their inter-connectedness in the context of communicable disease transmission
Source: Int J Health Geogr. 2026 Mar 14;25:24. doi: 10.1186/s12942-026-00456-8 (PMC13104494; doi:10.1186/s12942-026-00456-8)
Supplement: Supplementary file 4 — Additional File 4 [file 12942_2026_456_MOESM4_ESM.xlsx]

## Sheet: Sheet1
	Free Roaming HDR
STARC Code	N’Djamena	Guinea	Sierra Leone	Liberia	Côte d'Ivoire
S1.1	40	40	15	15	15
S1.2	40	40	15	15	15
S1.3	40	40	15	15	15
S1.4	40	40	15	15	15
S2.1	30	35	10	10	10
S2.2	30	35	10	10	10
S2.3	30	35	10	10	10
S2.4	30	35	10	10	10
S3.1	20	30	5	5	5
S3.2	20	30	5	5	5
S3.3	20	30	5	5	5
S3.4	20	30	5	5	5
S4.1	12	25	3	3	3
S4.2	12	25	3	3	3
S4.3	12	25	3	3	3
S4.4	12	25	3	3	3
S5.1	6	20	2	2	2
S5.2	6	20	2	2	2
S5.3	6	20	2	2	2
S5.4	6	20	2	2	2
